# Supplementary material for: Phase Ia Clinical Evaluation of the Safety and Immunogenicity of the Plasmodium falciparum Blood-Stage Antigen AMA1 in ChAd63 and MVA Vaccine Vectors
Source: PubMed Central journal article supplement (PMC3283618; doi:10.1371/journal.pone.0031208), 2012-02-21
Supplement: pone.0031208.s003.pdf [file pone.0031208.s003.pdf]

**Figure S2**

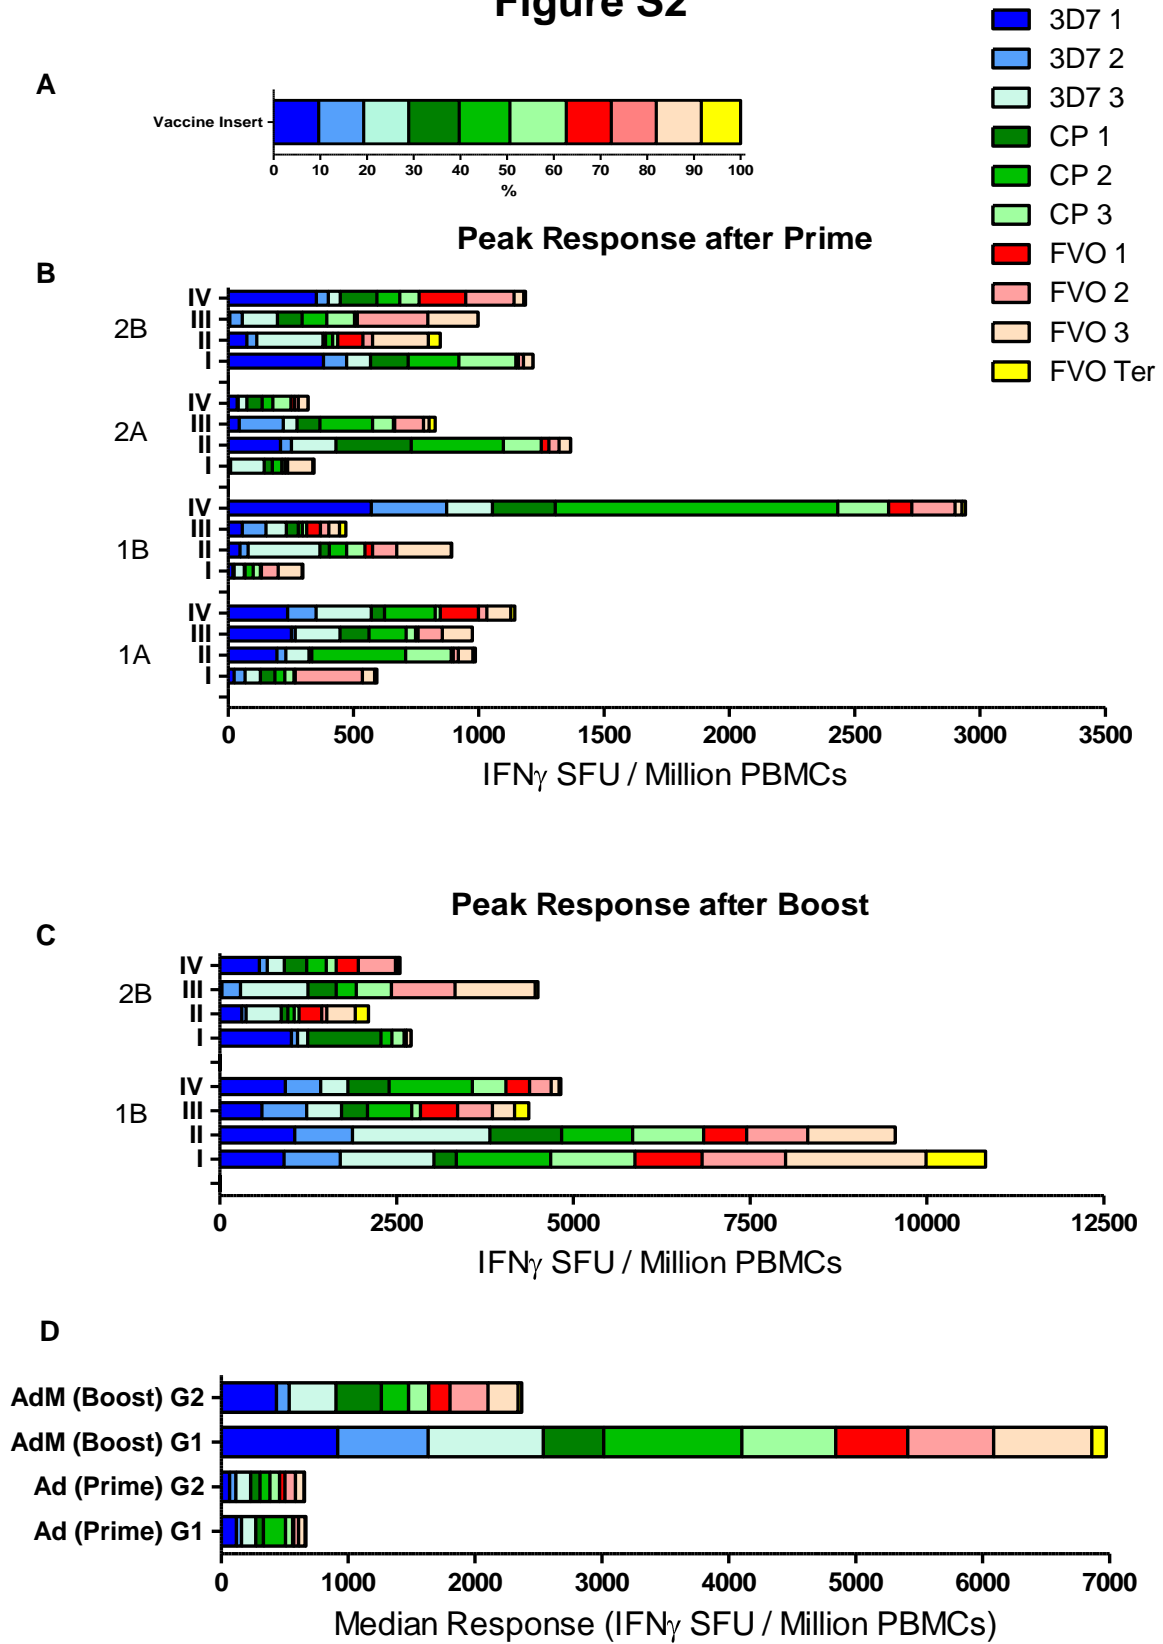

**Figure S2. Breakdown of ex-vivo IFN- $\gamma$  ELISPOT data according to total response. (A)** The % of the amino acid sequence within the AMA1 vaccine insert that is attributable to each peptide pool is shown. **(B)** Data show the total response to each peptide pool within the AMA1 insert for each volunteer at day 14 after ChAd63 AMA1 immunization. **(C)** Data show the total response to each peptide pool within the AMA1 insert for each volunteer at the peak of the response at day 63 after ChAd63-MVA immunization. **(D)** The median IFN- $\gamma$  response to each peptide pool within the AMA1 insert according to group (G1 or G2) and immunization regime (Ad = ChAd63, AdM = ChAd63-MVA) at the peak time-point (day 14 after ChAd63 prime and day 63 after ChAd63-MVA prime-boost). MVA dosage explained in Figure 1. Volunteer I = 2B (i), Volunteers II-IV = 2B (ii).
