# Supplementary material for: Phase Ia Clinical Evaluation of the Safety and Immunogenicity of the Plasmodium falciparum Blood-Stage Antigen AMA1 in ChAd63 and MVA Vaccine Vectors
Source: PubMed Central journal article supplement (PMC3283618; doi:10.1371/journal.pone.0031208), 2012-02-21
Supplement: pone.0031208.s006.pdf [file pone.0031208.s006.pdf]

# Figure S5

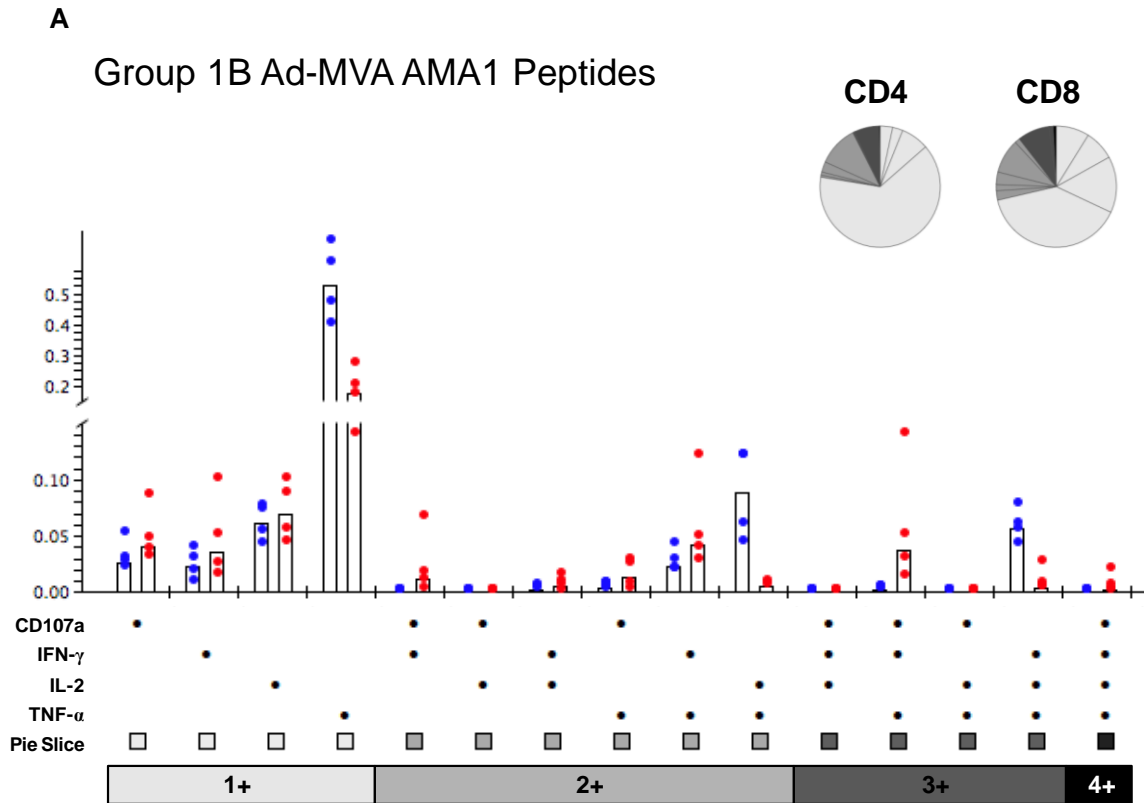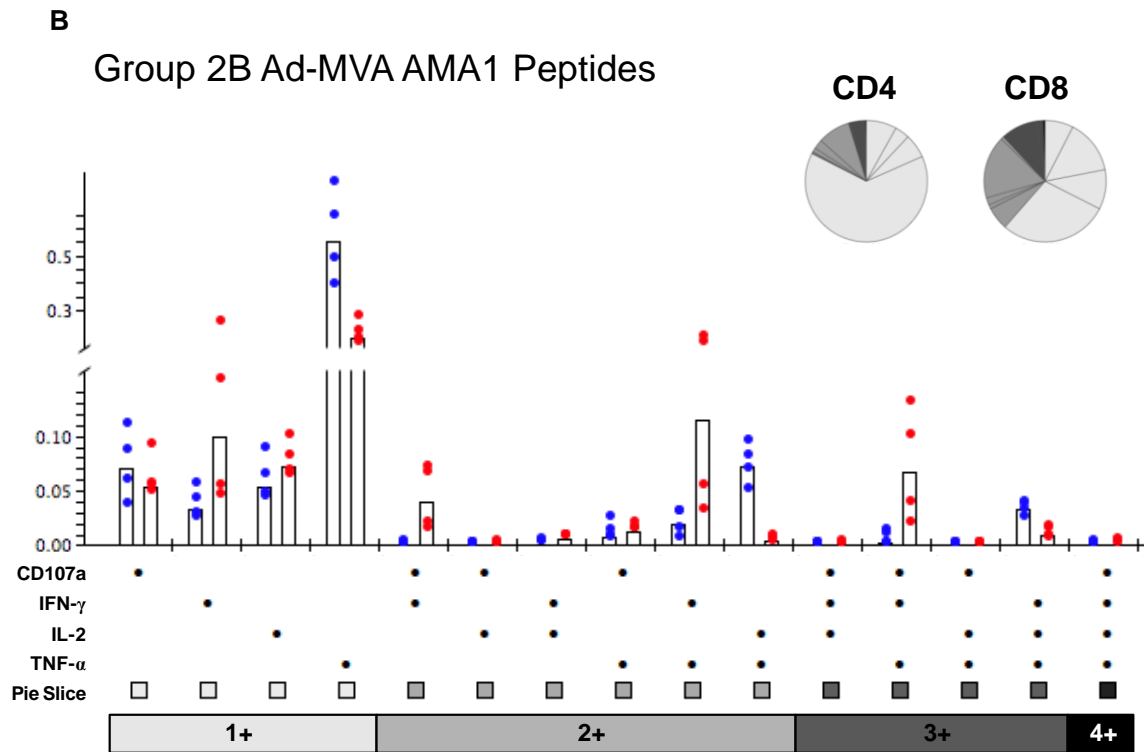

**Figure S5. T cell multi-functionality following ChAd63-MVA AMA1 immunization.** The multi-functionality of the CD3<sup>+</sup> T cell responses was assessed by polychromatic flow cytometry and ICS. Frozen PBMCs from day 84 were re-stimulated with a pool of AMA1 peptides and cells were stained as described. Gating strategy and representative plots are shown in Figure S6. The multi-functional compositions of the T cell responses following ChAd63-MVA immunization are shown for **(A)** CD4<sup>+</sup> and CD8<sup>+</sup> T cells in Group 1B following AMA1 peptide re-stimulation, and **(B)** CD4<sup>+</sup> and CD8<sup>+</sup> T cells in Group 2B following AMA1 peptide re-stimulation. Responses are grouped and colour-coded according to the CD4<sup>+</sup> and CD8<sup>+</sup> subsets, and the number of functions detected for each T cell population. Individual data points and median percentage of the parent CD4<sup>+</sup> or CD8<sup>+</sup> response (open bars) are shown for each of the functional populations indicated on the x-axis. The pie charts summarize the fractions of AMA1-specific CD4<sup>+</sup> or CD8<sup>+</sup> T cells that are positive for a given number of functions.
