# Supplementary material for: Phase Ia Clinical Evaluation of the Safety and Immunogenicity of the Plasmodium falciparum Blood-Stage Antigen AMA1 in ChAd63 and MVA Vaccine Vectors
Source: PubMed Central journal article supplement (PMC3283618; doi:10.1371/journal.pone.0031208), 2012-02-21
Supplement: pone.0031208.s007.pdf [file pone.0031208.s007.pdf]

# Figure S6

A

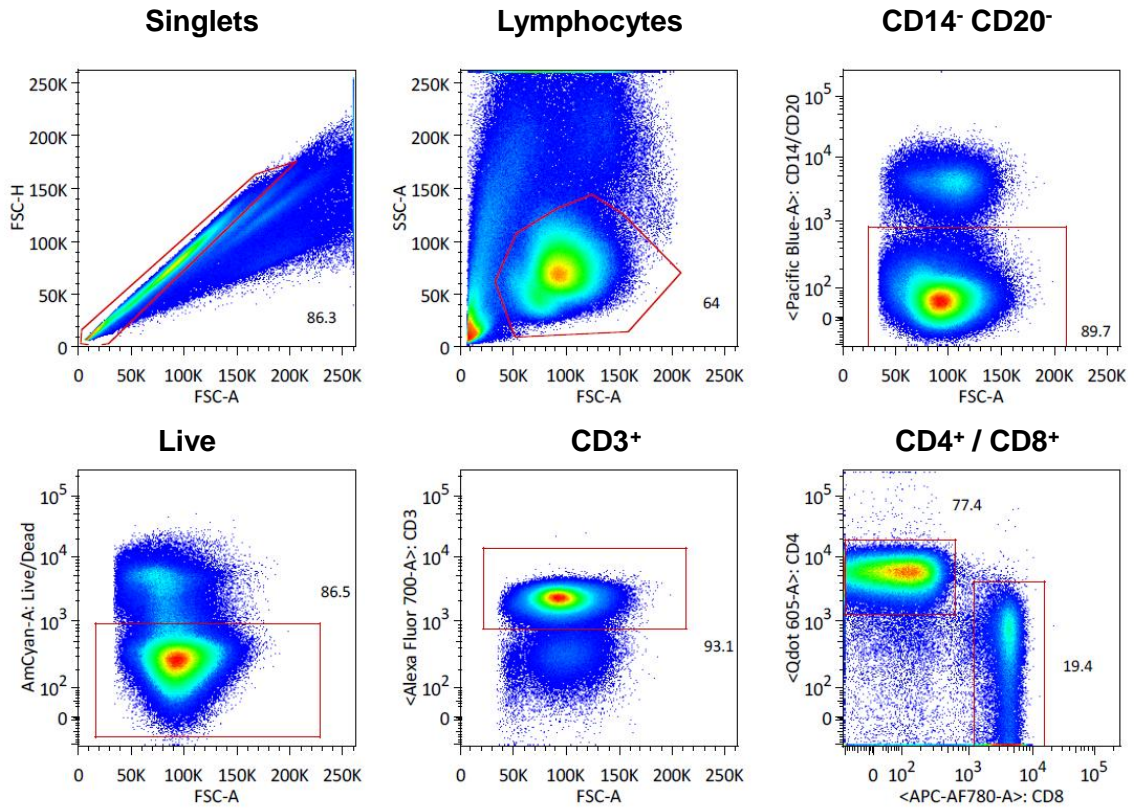

**B****CD4<sup>+</sup> cells**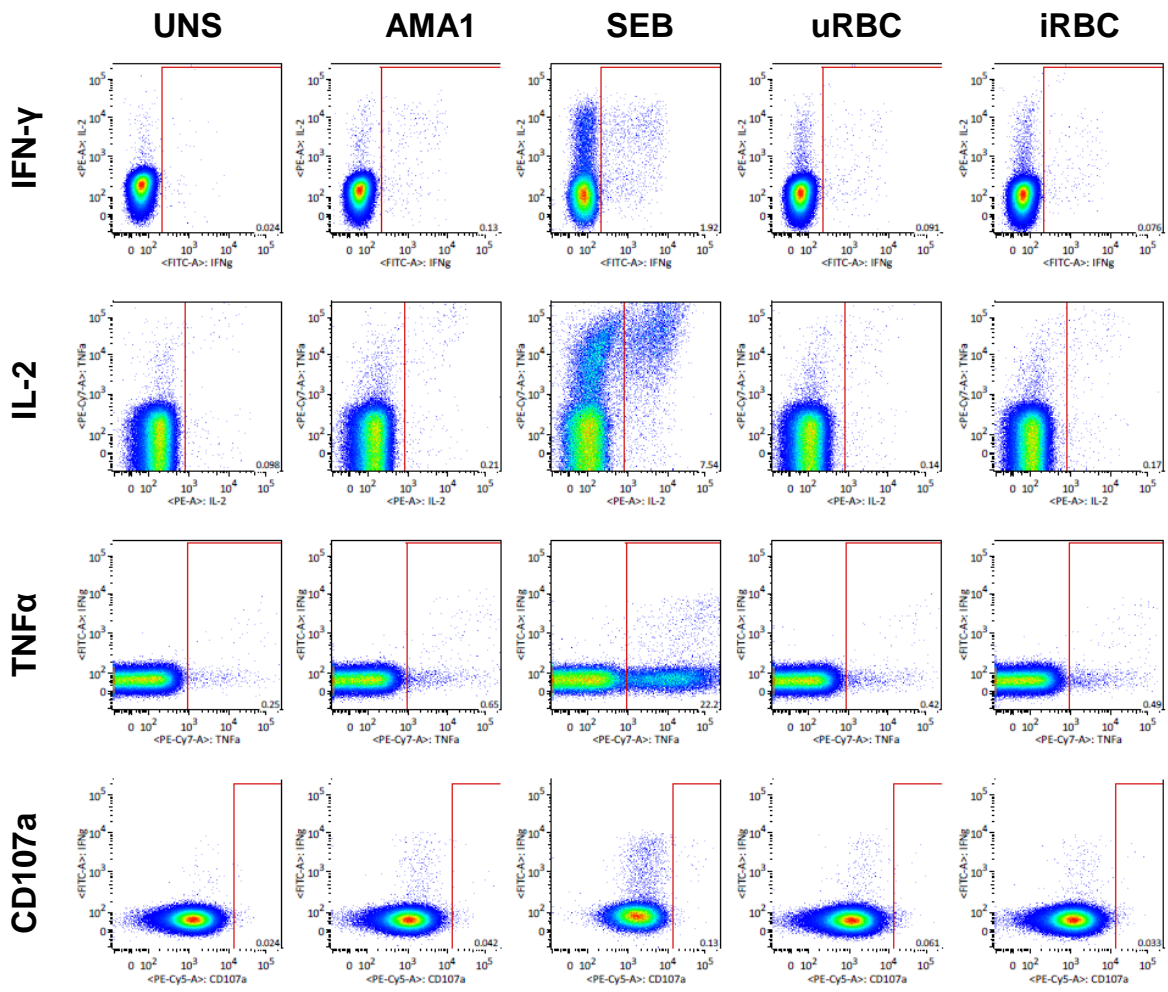

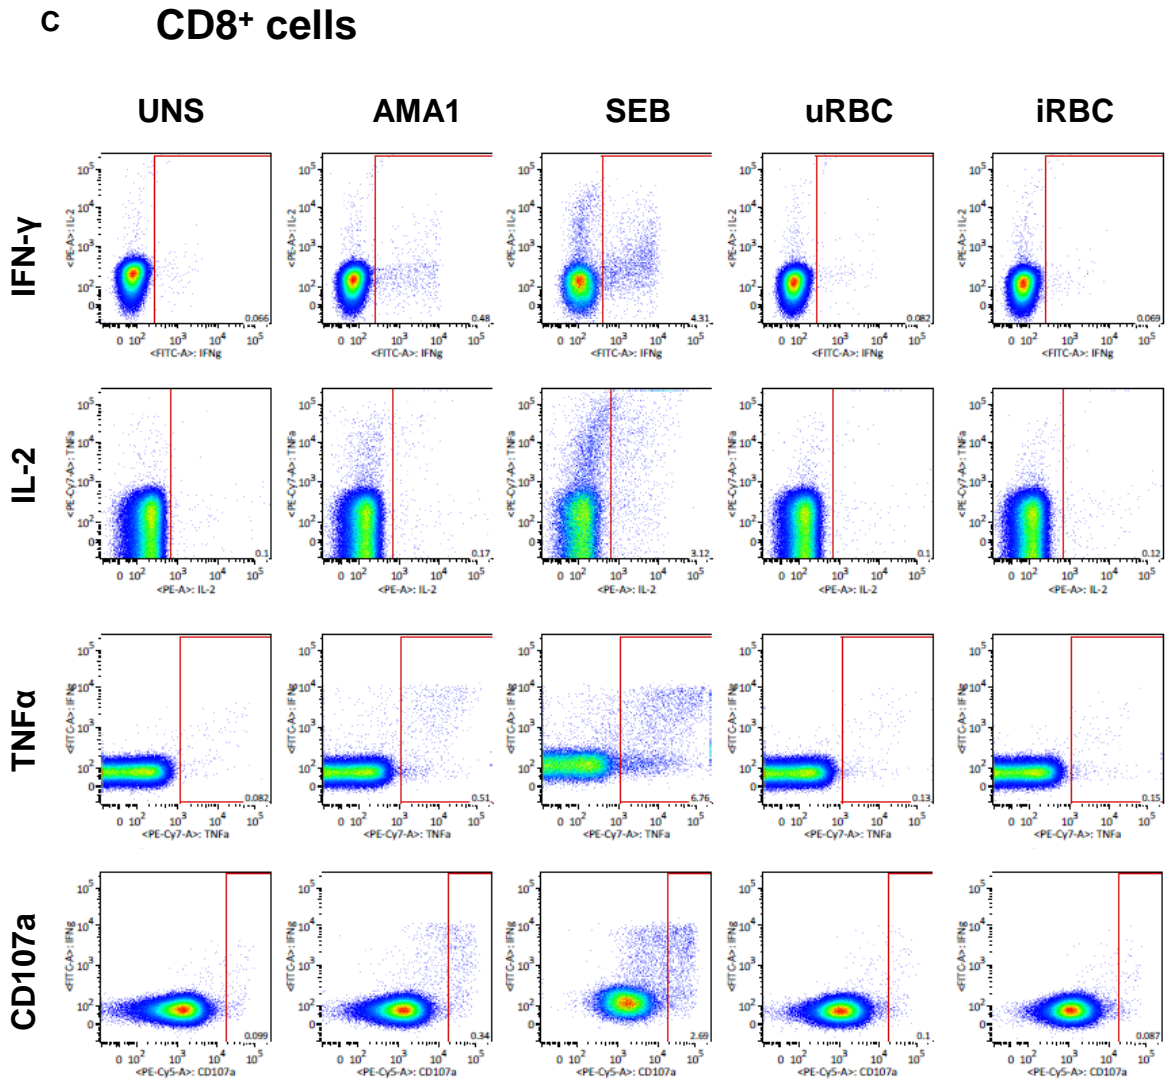

**Figure S6. Gating strategy for analysis of AMA1-specific T cell responses.** Representative flow cytometry plots are shown for the analysis of AMA1-specific T cell responses from volunteers immunized with ChAd63-MVA AMA1. **(A)** Initial gating used (from top left to bottom right) forward scatter area (FSC-A) versus forward scatter height (FSC-H) to remove doublet events and select singlet cells; then following this small lymphocytes were gated using FSC-A versus side scatter area (SSC-A); then live CD14<sup>-</sup> CD20<sup>-</sup> CD3<sup>+</sup> cells were selected; then CD4 versus CD8 was used to select the total CD4<sup>+</sup> CD8<sup>-</sup> cell population and vice versa for the CD8<sup>+</sup> CD4<sup>-</sup> population. Cytokine (IFN-γ, IL-2 and TNFα) and CD107a gating using bivariate plots is shown for **(B)** CD4<sup>+</sup> cells and **(C)** CD8<sup>+</sup> cells. **(B)** Representative plots for un-stimulated (UNS), AMA1 peptide stimulated (AMA1), SEB, uRBC and iRBC

stimulated samples are shown. IFN- $\gamma$  (top row), IL-2 (second row), TNF $\alpha$  (third row) and CD107a (bottom row) for the CD8<sup>-</sup> CD4<sup>+</sup> T cell population were analyzed using bivariate plots. Percentages refer to the % of CD8<sup>-</sup> CD4<sup>+</sup> cells that express the specific cytokine or marker. Background responses in UNS or uRBC control cells were subtracted from the AMA1 and iRBC response respectively during the analysis. **(C)** Same analysis as in **(B)**, except for the CD4<sup>-</sup> CD8<sup>+</sup> T cell population.
