# Supplementary material for: Phase Ia Clinical Evaluation of the Safety and Immunogenicity of the Plasmodium falciparum Blood-Stage Antigen AMA1 in ChAd63 and MVA Vaccine Vectors
Source: PubMed Central journal article supplement (PMC3283618; doi:10.1371/journal.pone.0031208), 2012-02-21
Supplement: pone.0031208.s008.pdf [file pone.0031208.s008.pdf]

**Figure S7**

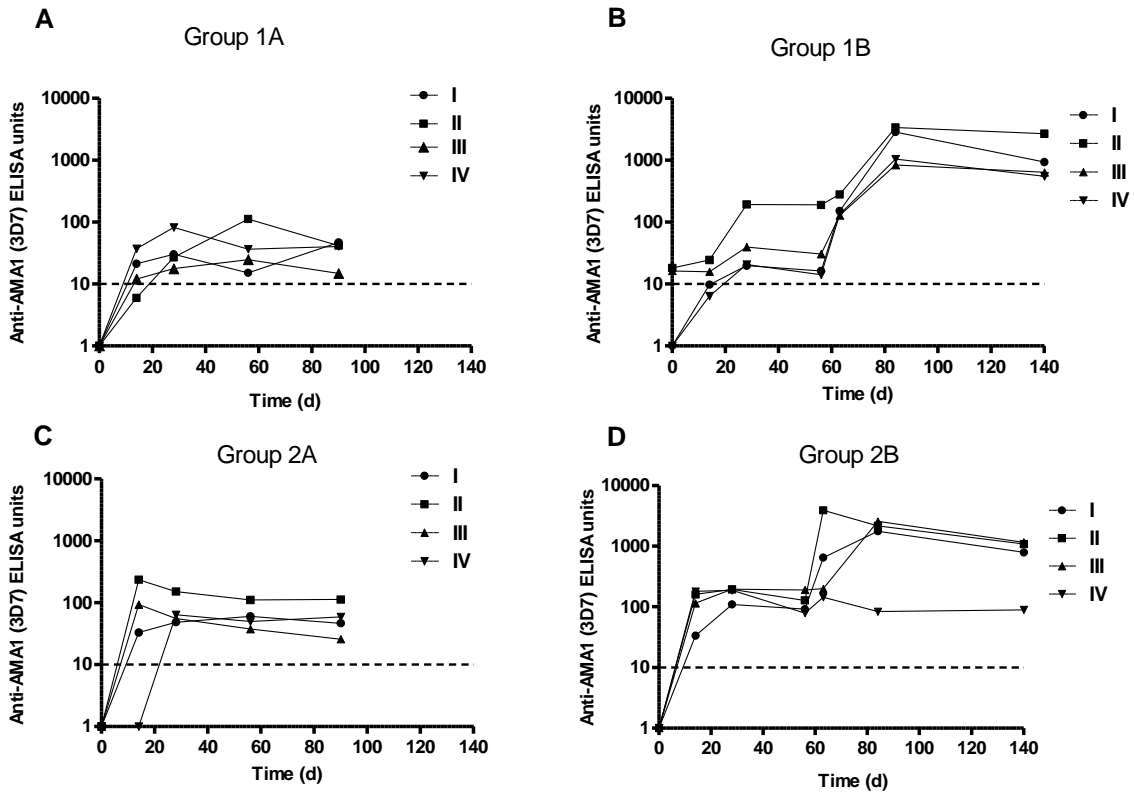

**Figure S7. Individual IgG ELISA data.** Total IgG ELISA responses against 3D7 PfAMA1 as measured in the serum over time following immunization in **(A)** Group 1A ( $n = 4$ ), **(B)** Group 1B ( $n = 4$ ), **(C)** Group 2A ( $n = 4$ ), and **(D)** Group 2B ( $n = 4$ ). MVA dosage explained in Figure 1. Volunteer I = 2B (i), Volunteers II-IV = 2B (ii).
