# Supplementary material for: Phase Ia Clinical Evaluation of the Safety and Immunogenicity of the Plasmodium falciparum Blood-Stage Antigen AMA1 in ChAd63 and MVA Vaccine Vectors
Source: PubMed Central journal article supplement (PMC3283618; doi:10.1371/journal.pone.0031208), 2012-02-21
Supplement: pone.0031208.s010.pdf [file pone.0031208.s010.pdf]

# Figure S9

A

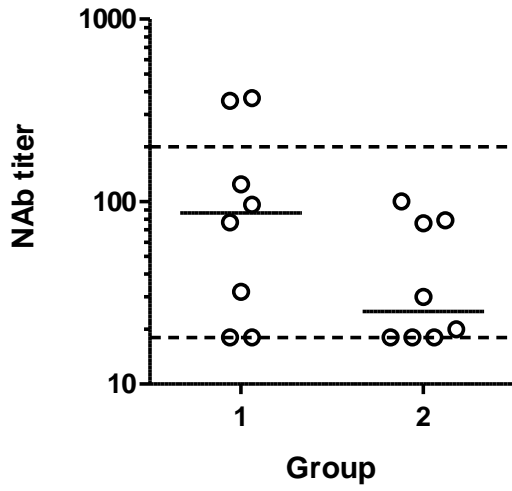

B

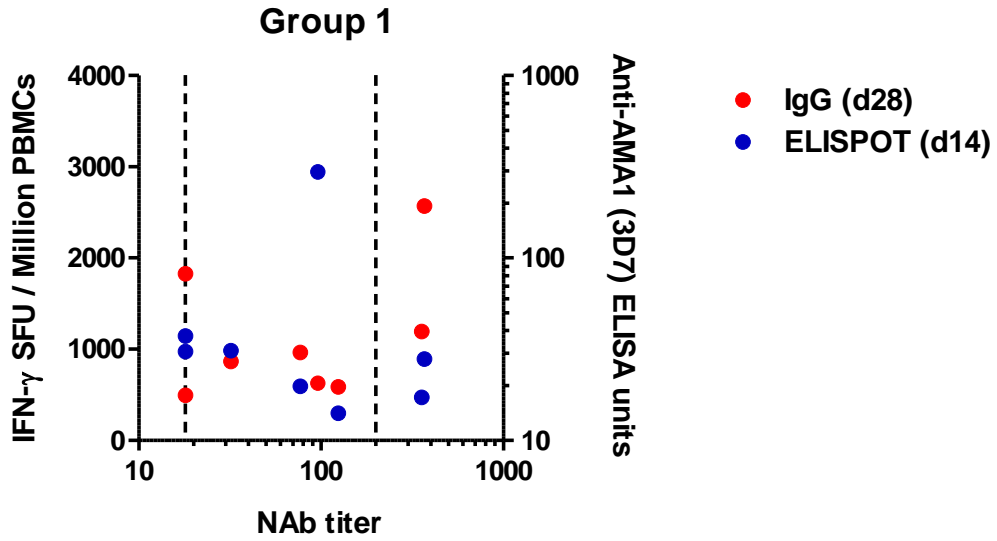

C

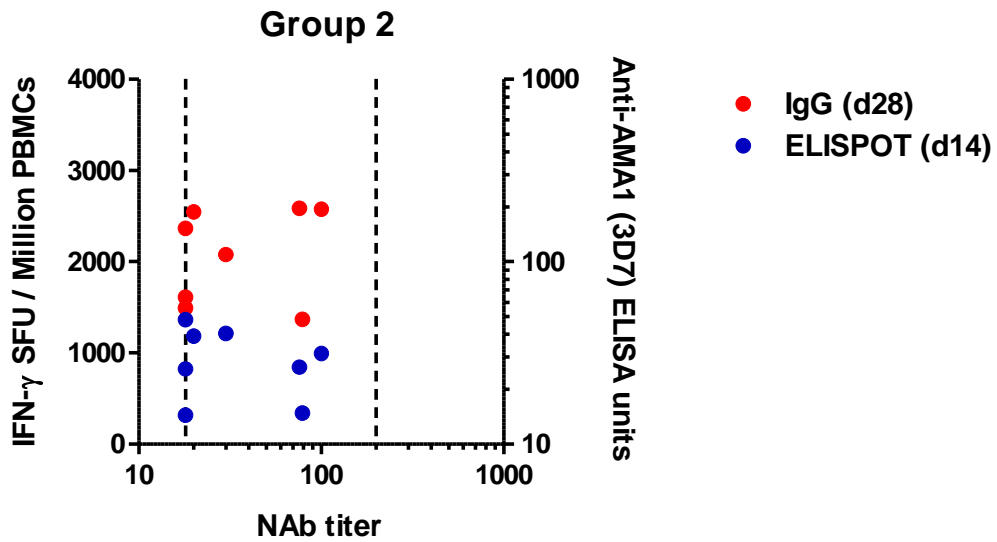

**Figure S9. Baseline NAb responses against ChAd63.** NAb titers against ChAd63 were assayed in the pre-immunization (day 0) serum of all volunteers. **(A)** Individual and median responses in Groups 1 and 2 are shown. The dotted lines indicate the level at which responses were classed as negative (titer <1:18) and high (titers >1:200). There was no significant difference between the volunteers enrolled into Group 1 or Group 2 ( $n = 8$  per group,  $P = 0.18$ , Mann Whitney test). There were no significant correlations in either **(B)** Group 1 or **(C)** Group 2 between these low level pre-existing NAb titers and ChAd63 AMA1 immunogenicity as assessed by peak total summed AMA1 ELISPOT response at day 14 (blue) or anti-AMA1 (3D7) total IgG ELISA at day 28 (red). These were selected as the peak of the priming immune responses following ChAd63 AMA1 immunization.  $r_s = 0.36$ ,  $P = 0.39$  (ELISA) or  $r_s = -0.53$ ,  $P = 0.20$  (ELISPOT) in Group 1; and  $r_s = 0.32$ ,  $P = 0.43$  (ELISA) or  $r_s = -0.02$ ,  $P = 0.98$  (ELISPOT) in Group 2.
