# Supplementary material for: Phase Ia Clinical Evaluation of the Safety and Immunogenicity of the Plasmodium falciparum Blood-Stage Antigen AMA1 in ChAd63 and MVA Vaccine Vectors
Source: PubMed Central journal article supplement (PMC3283618; doi:10.1371/journal.pone.0031208), 2012-02-21
Supplement: pone.0031208.s013.pdf [file pone.0031208.s013.pdf]

**Table S1. Assessment of severity of AEs.**

| <b>Scale</b> | <b>Description</b> | <b>Definition</b>                                                                    |
|--------------|--------------------|--------------------------------------------------------------------------------------|
| <b>0</b>     |                    | Absence of the indicated symptom                                                     |
| <b>1</b>     | Mild               | Awareness of a symptom but the symptom is easily tolerated                           |
| <b>2</b>     | Moderate           | Discomfort enough to cause interference with usual activity                          |
| <b>3</b>     | Severe             | Incapacitating; unable to perform usual activities; requires absenteeism or bed rest |
