# Supplementary material for: Phase Ia Clinical Evaluation of the Safety and Immunogenicity of the Plasmodium falciparum Blood-Stage Antigen AMA1 in ChAd63 and MVA Vaccine Vectors
Source: PubMed Central journal article supplement (PMC3283618; doi:10.1371/journal.pone.0031208), 2012-02-21
Supplement: pone.0031208.s014.pdf [file pone.0031208.s014.pdf]

**Table S2. Assessment of severity of local AEs.**

**(A) Swelling & Erythema**

| <b>Grade</b> | <b>Diameter (mm)</b> |
|--------------|----------------------|
| 0            | 0                    |
| 1            | 1 - 50               |
| 2            | >50 – 100            |
| 3            | > 100                |

**(B) Pain**

| <b>Grade</b> | <b>Description</b>                                                                                                  |
|--------------|---------------------------------------------------------------------------------------------------------------------|
| <b>0</b>     | No pain at all                                                                                                      |
| <b>1</b>     | Painful to touch, no restriction in movement of arms, able to work, drive, carry heavy objects as normal            |
| <b>2</b>     | Painful when limb is moved<br><i>(i.e. restriction in range of movement in arm, difficulty in carrying objects)</i> |
| <b>3</b>     | Severe pain at rest<br><i>(i.e. unable to use arm due to pain.)</i>                                                 |
