# Supplementary material for: Phase Ia Clinical Evaluation of the Safety and Immunogenicity of the Plasmodium falciparum Blood-Stage Antigen AMA1 in ChAd63 and MVA Vaccine Vectors
Source: PubMed Central journal article supplement (PMC3283618; doi:10.1371/journal.pone.0031208), 2012-02-21
Supplement: pone.0031208.s015.pdf [file pone.0031208.s015.pdf]

**Table S3. Assessment of relationship of AE to vaccination.**

|   |                        |                                                                                                                                                                                                                                              |
|---|------------------------|----------------------------------------------------------------------------------------------------------------------------------------------------------------------------------------------------------------------------------------------|
| 0 | <b>No Relationship</b> | <p>No temporal relationship to study product <b>and</b></p> <p>Alternate aetiology (clinical state, environmental or other interventions); <b>and</b></p> <p>Does not follow known pattern of response to study product</p>                  |
| 1 | <b>Possible</b>        | <p>Reasonable temporal relationship to study product; <b>or</b></p> <p>Event not readily produced by clinical state, environmental or other interventions; <b>or</b></p> <p>Similar pattern of response to that seen with other vaccines</p> |
| 2 | <b>Probable</b>        | <p>Reasonable temporal relationship to study product; <b>and</b></p> <p>Event not readily produced by clinical state, environment, or other interventions <b>or</b></p> <p>Known pattern of response seen with other vaccines</p>            |
| 3 | <b>Definite</b>        | <p>Reasonable temporal relationship to study product; <b>and</b></p> <p>Event not readily produced by clinical state, environment, or other interventions; <b>and</b></p> <p>Known pattern of response seen with other vaccines</p>          |
