# Supplementary material for: Phase Ia Clinical Evaluation of the Safety and Immunogenicity of the Plasmodium falciparum Blood-Stage Antigen AMA1 in ChAd63 and MVA Vaccine Vectors
Source: PubMed Central journal article supplement (PMC3283618; doi:10.1371/journal.pone.0031208), 2012-02-21
Supplement: pone.0031208.s016.pdf [file pone.0031208.s016.pdf]

**Table S4. AMA1 overlapping peptides.**

| #   | Sequence              | Pool | #    | Sequence              | Pool |
|-----|-----------------------|------|------|-----------------------|------|
| A1  | QNYWEHPYQNSDVYRPINEH  | 3D71 | A45  | DNDDEGNKKIIPRIFISDD   | CP 3 |
| A2  | SDVYRPINEHREHPKEYEYP  | 3D71 | A46  | IAPRIFISDDKDSLKCPCDP  | CP 3 |
| A3  | REHPKEYEYPLHQEHTYQQE  | CP 1 | A47  | KDSLKCPCDPEMVSQSTCRF  | CP 3 |
| A4  | LHQEHTYQQEDSGEDENTLQ  | CP 1 | A48  | EMVSQSTCRFFVCKCVERRA  | CP 3 |
| A5  | DSGEDENTLQHAYPIDHEGA  | CP 1 | A49  | FVCKCVERRAEVTSNNEVVV  | CP 3 |
| A6  | HAYPIDHEGAEPAPQEQLNF  | CP 1 | A50  | EVTSNNEVVVKEEYKDEYAD  | CP 3 |
| A7  | EPAPQEQLNFSSIEIVERSN  | CP 1 | A51  | KEEYKDEYADIPEHKPTYDK  | CP 3 |
| A8  | SSIEIVERSNYMGNPWTEYM  | CP 1 | A52  | IPEHKPTYDKMKGGPGGG    | 3D73 |
| A9  | YMGNPWTEYMAKYDIEEVHG  | CP 1 | A53  | QNYWEHPYQKSDVYHPINEH  | FVO1 |
| A10 | AKYDIEEVHGSIRVDLGED   | CP 1 | A54  | SDVYHPINEHREHPKEYEYP  | FVO1 |
| A11 | SGIRVDLGEDAEVAGTQYRL  | CP 1 | A68  | FLTPVATGNQDLKDGGFAPF  | FVO1 |
| A12 | AEVAGTQYRLPSGKCPVFGK  | CP 2 | A69  | DLKDGGFAPPTNPLISPMT   | FVO1 |
| A13 | PSGKCPVFGKGIIIENSKTT  | CP 2 | A70  | PTNPLISPMTLNGMRDFYKN  | FVO1 |
| A14 | GIIIENSKTTFLTPVATGNQ  | CP 2 | A71  | LNGMRDFYKNNEYVKNLDEL  | FVO1 |
| A15 | FLTPVATGNQYLKDGGFAPF  | 3D71 | A72  | NEYVKNLDELTLCSRHAGNM  | FVO1 |
| A16 | YLKDGGFAPFTEPLMSPMT   | 3D71 | A73  | TLCSRHAGNMNPDNDKNSNY  | FVO1 |
| A17 | PTEPLMSPMTLDEMRFYKD   | 3D71 | A74  | NPDNDKNSNYKYPVYDYND   | FVO2 |
| A18 | LDEMRFYKDNKYVKNLDEL   | 3D71 | A75  | KYPVYDYNDKKCHILYIAA   | FVO2 |
| A19 | NKYVKNLDELTLCSRHAGNM  | 3D71 | A77  | QENNGPRYCNKDQSKRNSMF  | FVO2 |
| A20 | TLCSRHAGNMIPDNDKNSNY  | 3D71 | A78  | KDQSKRNSMFCFRPAKDKLF  | FVO2 |
| A21 | IPDNDKNSNYKYPVYDDKD   | 3D72 | A79  | CFRPAKDKLFENLVYLSKNV  | FVO2 |
| A22 | KYPVYDDKDKKCHILYIAA   | 3D72 | A80  | ENLVYLSKNVVDNWEEVCPR  | FVO2 |
| A23 | KKCHILYIAAQENNGPRYCN  | CP 2 | A81  | VDNWEEVCPRKNLENKFL    | FVO2 |
| A24 | QENNGPRYCNKDESKRNSMF  | 3D72 | A82  | KNLENKFLWVDGNCEDIP    | FVO2 |
| A25 | KDESKRNSMFCFRPAKDISF  | 3D72 | A83  | WVDGNCEDIPHVNEFSANDL  | FVO3 |
| A26 | CFRPAKDISFQNLVYLSKNV  | 3D72 | A84  | HVNEFSANDLFECNKLVEFEL | FVO3 |
| A27 | QNLVYLSKNVVDNWWEKVCPR | 3D72 | A90  | FKADRYKSHGKGYNWGNYNR  | FVO3 |
| A28 | VDNWWEKVCPRKNLQNAKFL  | 3D72 | A91  | KGYNWGNYNRETQKCEIFNV  | FVO3 |
| A29 | KNLQNAKFLWVDGNCEDIP   | 3D72 | A94  | YIATTALSHPIEVEHNFPSCS | FVO3 |
| A30 | WVDGNCEDIPHVNEFPAIDL  | 3D73 | A95  | IEVEHNFPSCSLYKDEIKKEI | FVO3 |
| A31 | HVNEFPAIDLFECNKLVEFEL | 3D73 | A96  | LYKDEIKKEIERESKRIKLN  | FVO3 |
| A32 | FECNKLVEFELSASDQPKQYE | CP 2 | A105 | IPEHKPTYDNMKIIIASSAA  | FVO3 |
| A33 | SASDQPKQYEQHLTDYEKIK  | CP 2 | A106 | MKIIIASSAAVAVLATILMV  | FVOT |
| A34 | QHLTDYEKIKEGFKNKNREM  | CP 2 | A107 | VAVLATILMVYLYKRKGNAE  | FVOT |
| A35 | EGFKNKNREMIKSAFLPTGA  | CP 2 | A108 | YLYKRKGNAEKYDKMDQPQH  | FVOT |
| A36 | IKSAFLPTGAFKADRYKSHG  | CP 2 | A109 | KYDKMDQPQHYGKSTSRNDE  | FVOT |
| A37 | FKADRYKSHGKGYNWGNYNR  | 3D73 | A110 | YGKSTSRNDEMMLDPEASFWG | FVOT |
| A38 | KGYNWGNYNRTETQKCEIFNV | 3D73 | A111 | MLDPEASFWGEEKRASHTTP  | FVOT |
| A39 | ETQKCEIFNVKPTCLINDKN  | CP 3 | A112 | EKRASHTTPVLMKEPYY     | FVOT |
| A40 | KPTCLINDKNYIATTALSHP  | CP 3 | tPA1 | MDAMKRGLCCVLLLC       | tPA  |
| A41 | YIATTALSHPIEVENNFPCS  | 3D73 | tPA2 | RGLCCVLLLCGAVFV       | tPA  |
| A42 | IEVENNFPCS LYKDEIMKEI | 3D73 | tPA3 | VLLLCGAVFVSPSQE       | tPA  |
| A43 | LYKDEIMKEIERESKRIKLN  | 3D73 | tPA4 | GAVFVSPSQEIHARF       | tPA  |
| A44 | ERESKRIKLN DNDDEGNKKI | CP 3 | tPA5 | SPSQEIHARFR           | tPA  |

20mer peptides overlapping by 10 amino acids (aa) were generated for the whole of the AMA1 vaccine insert present in the ChAd63 and MVA vaccines. Peptides were divided into pools containing up to 10 peptides and were divided up according to whether they were 3D7 strain specific (3 pools,  $n = 24$ ), FVO specific (3 pools,  $n = 24$ ), common peptides (CP; 3 pools,  $n = 28$ ), FVO terminus peptides (FVOT; 1 pool,  $n = 7$ ). A single pool of tPA peptides ( $n = 5$ ) was used and these were 15mers overlapping by 10aa. Amino acids that were substituted to prevent potential N-linked glycosylation are indicated in bold.
