# Supplementary material for: Phase Ia Clinical Evaluation of the Safety and Immunogenicity of the Plasmodium falciparum Blood-Stage Antigen AMA1 in ChAd63 and MVA Vaccine Vectors
Source: PubMed Central journal article supplement (PMC3283618; doi:10.1371/journal.pone.0031208), 2012-02-21
Supplement: pone.0031208.s017.pdf [file pone.0031208.s017.pdf]

**Table S5. Vaccine versus Native peptides.**

| #   | Sequence                                  | Pool | #   | Sequence                                   | Pool |
|-----|-------------------------------------------|------|-----|--------------------------------------------|------|
| 31  | VFGKGIIIENSKTTF                           | V    | 112 | VFGKGIIIENS <b>N</b> TTF                   | N    |
| 32  | IIIENSKTTFLTPVA                           | V    | 113 | IIIENS <b>N</b> TTFLTPVA                   | N    |
| 33  | SKTTFLTPVATGNQY                           | V    | 114 | <b>S</b> NTTFLTPVATGNQY                    | N    |
| 56  | FRPAKDISFQ <b>N</b> LVYL                  | V    | 115 | FRPAKDISFQ <b>N</b> YTYL                   | N    |
| 57  | DISFQ <b>N</b> LVYLSKNVV                  | V    | 116 | DISFQ <b>N</b> YTYLSKNVV                   | N    |
| 58  | <b>N</b> LVYLSKNVVVDNWEK                  | V    | 117 | <b>N</b> YTYLSKNVVVDNWEK                   | N    |
| 73  | EKIKEGFKN <b>K</b> NREMI                  | V    | 118 | EKIKEGFKN <b>N</b> ASMI                    | N    |
| 74  | GFKN <b>K</b> NREMIKSAFL                  | V    | 119 | GFKN <b>N</b> ASMIKSAFL                    | N    |
| 75  | <b>N</b> REMIKSAFLPTGAF                   | V    | 120 | <b>N</b> ASMIKSAFLPTGAF                    | N    |
| 83  | IFNVKPTCLIN <b>D</b> KNY                  | V    | 121 | IFNVKPTCLIN <b>S</b> SY                    | N    |
| 84  | PTCLIN <b>D</b> KNYIATTA                  | V    | 122 | PTCLIN <b>S</b> SYIATTA                    | N    |
| 85  | <b>N</b> DKNYIATTALSHPI                   | V    | 123 | <b>N</b> SSYIATTALSHPI                     | N    |
| 98  | DSLKCPCDPEM <b>V</b> SQS                  | V    | 124 | DSLKCPCDPEM <b>S</b> NS                    | N    |
| 99  | PCDPEM <b>V</b> SQSTCRFF                  | V    | 125 | PCDPEM <b>S</b> NSTCRFF                    | N    |
| 100 | M <b>V</b> SQSTCRFFVCKCV                  | V    | 126 | M <b>S</b> NSTCRFFVCKCV                    | N    |
| 32  | IIIENSKTTFLTPVA                           | V    | 194 | IIIENS <b>N</b> TTFLKPVA                   | N    |
| 147 | SKTTFLTPVATGN <b>Q</b> D                  | V    | 195 | <b>S</b> NTTFLKPVATGN <b>Q</b> D           | N    |
| 148 | LTPVATGN <b>Q</b> DLKDGG                  | V    | 196 | LKPVATGN <b>Q</b> DLKDGG                   | N    |
| 167 | FRPAKD <b>K</b> L <b>F</b> EN <b>V</b> YL | V    | 197 | FRPAKD <b>K</b> L <b>F</b> EN <b>Y</b> TYL | N    |
| 168 | DKL <b>F</b> EN <b>V</b> YLSKNVV          | V    | 198 | DKL <b>F</b> EN <b>Y</b> TYLSKNVV          | N    |
| 169 | <b>N</b> LVYLSKNVVVDN <b>W</b> EE         | V    | 199 | <b>N</b> YTYLSKNVVVDN <b>W</b> EE          | N    |

15mer peptide sequences are shown, and pools indicated: V = sequence found in vaccine insert ( $n = 21$ ); N = sequence found in native parasite ( $n = 21$ ). Amino acids that were substituted to prevent potential N-linked glycosylation are highlighted in bold.
